# Supplementary material for: Redefining Unilateral Pulmonary Edema after Mitral Valve Surgery on Chest X-ray Imaging Using the RALE Scoring System
Source: MDPI journal article supplement (doi:10.3390/jcm12186043), 2023-09-19
Supplement: s1 [file s1]

# **Redefining Unilateral Pulmonary Edema after Mitral Valve Surgery on Chest X-ray Imaging Using the RALE Scoring System**

## **Supplementary Image**

## Supplementary Figure:

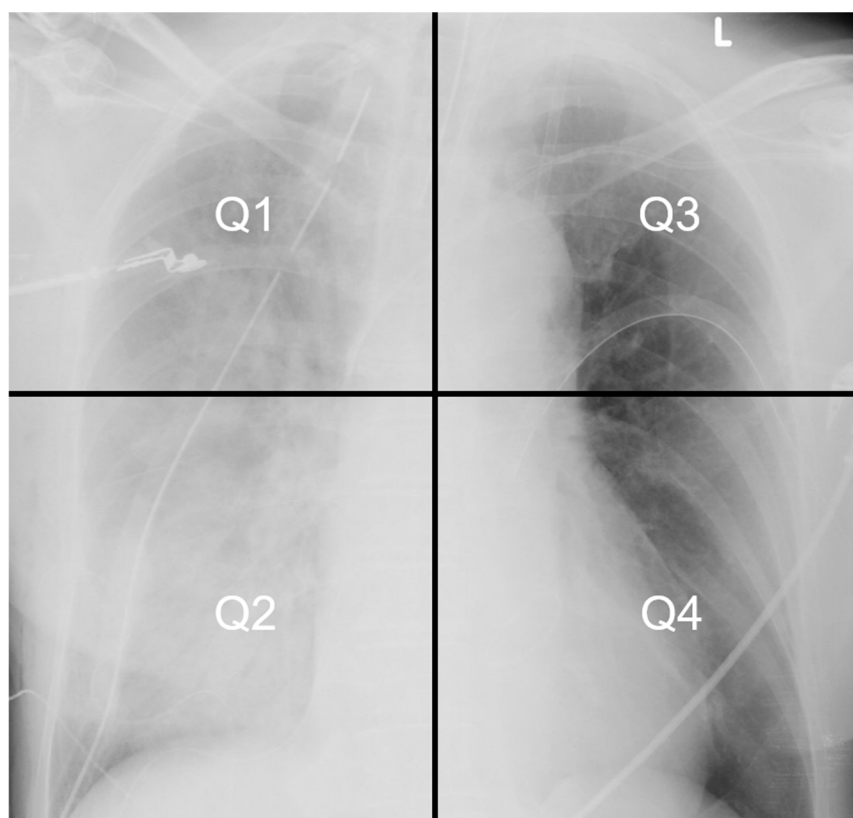

|                  | Q1 | Q2 | Q3 | Q4 |
|------------------|----|----|----|----|
| Consolidation    | 4  | 4  | 1  | 2  |
| Opacities        | 3  | 3  | 1  | 4  |
| Quadrant score   | 12 | 12 | 1  | 8  |
| Lateral score    | 24 |    | 9  |    |
| Overall score    | 33 |    |    |    |
| Score difference | 15 |    |    |    |

### Supplementary Figure S1 – RALE score calculation example

This patient was diagnosed with UPE in the immediate postoperative period. An exemplary calculation of the RALE score is provided, showing diagnostic features suggestive of UPE (right-sided score >13 and score difference >12).

Table S1. **Previous studies** investigating incidence of UPE after MVS.

| Study                   | Incidence of UPE                   | N                                                                       | Diagnostic criteria for UPE                                                                                                                                                                                        | period    |
|-------------------------|------------------------------------|-------------------------------------------------------------------------|--------------------------------------------------------------------------------------------------------------------------------------------------------------------------------------------------------------------|-----------|
| Khalil et al. (2020)    | 1.6% (UPE)<br>18.8% (UPC)          | 382 (elective MIV cardiac surgery)                                      | UPC: blurring of central vessel contours, cuffing, Kerley lines<br>UPE: Severe UPC, completely shaded lung parenchyma                                                                                              | 2013-2014 |
| Kesävuori et al. (2020) | 18.6%                              | 231 (elective MI-MVS)                                                   | Opacification of the right lung $\geq 25\%$ , interstitial thickening, consolidation with air bronchograms                                                                                                         | 2009-2017 |
| Pühler et al. (2021)    | 18.3%                              | 629 (MI-MVS)                                                            | $>20\%$ opacification of the right hemithorax, no direct or indirect signs for atelectasis or other infiltrates occurred within the first 24h postoperatively                                                      | 2009-2019 |
| López et al. (2022)     | 28%                                | 93 (MI-MVS)                                                             |                                                                                                                                                                                                                    | 2015-2017 |
| Tutschka et al. (2015)  | 25%                                | 277 (cardiac surgery with right Mini thoracotomy + CPB)                 | Relatively increased opacification of the right versus left hemithorax involving at least 20% of the hemithorax, no atelectasis                                                                                    | 2005-2012 |
| Renner et al. (2017)    | 19.9%                              | 256 (MI-MVS)                                                            | $>20\%$ opacification of the right hemithorax, no direct or indirect signs for atelectasis or other infiltrates occurred within the first 24h postoperatively                                                      | 2008-2015 |
| Irisawa et al. (2014)   | 2.1% (reexpansion pulmonary edema) | 381 (minimally invasive cardiac surgery with singless-lung ventilation) | RPO was diagnosed by expert radiologists as a new and apparent UPE on a chest radiography and computed tomography after operation, exclusion of atelectasis                                                        | 2005-2013 |
| Keyl et al. (2015)      | 7.9%                               | 484 (minimally invasive cardiac surgery with unilateral lung collapse)  | Newly developed UPE which was radiographically evident within 24h after surgery                                                                                                                                    | 2008-2013 |
| Moss et al. (2017)      | 1.2%                               | 1257 (robotic MVS)                                                      | Radiologic evidence: multilobed right lung pulmonary infiltration developing within 4h of CPB, with profuse if straw-coloured fluid from the right main stem bronchus, additionally clinical signs were considered | 2006-2012 |
